# Supplementary material for: Adenine-based polymer modified zinc oxide for efficient inverted organic solar cells
Source: Royal Society of Chemistry journal article supplement (doi:10.1039/d1tc01648b), 2021-01-01
Supplement: d1tc01648b1.pdf [file d1tc01648b1.pdf]

# Supplementary Information

## **Adenine-based Polymer Modifying Zinc Oxide for Efficient Inverted Organic Solar Cells**

Yi Wang, Ming Liu, Zhihui Chen, Yao Liu\*

Beijing Advanced Innovation Center for Soft Matter Science and Engineering, State Key Laboratory of Chemical Resource Engineering, Beijing University of Chemical Technology  
Beijing, 100029 (China).

E-mail: liuyao@mail.buct.edu.cn

**Materials:** Zinc acetate (ZnAc), potassium hydroxide (KOH) were purchased from J&K. 2,2,2-Trifluoroethanol (99.8%) and 1-chloronaphthalene (85%) were purchased from Acros. 1,8-diiodoctane (98%) and chlorobenzene (99.8%) were purchased from Sigma Aldrich. PTB7 was purchased from 1-Material, and PC<sub>71</sub>BM was purchased from Nano-C. PM6 was obtained from Solamer, Inc. Y6 was purchased from eflexpv.

**Instrumentation:** The AFM measurements were conducted on a DMFASTSCAN2-SYS (Bruker, USA) in tapping mode with a 5µm scanner at 1Hz speed. Film thickness was determined by the surface profiler manufactured by Bruker (model DEKTAK-XT) and samples were made on pre-cleaned glass substrates. XPS measurements were carried out by ESCALAB 250 (Thermo Fisher Scientific USA), equipped with monochromatic Al Kα 150 W X-ray source. The SKP scans were conducted on SKP5050 (KP Technology Ltd.). The samples for SKP measurements were prepared on ITO substrates. The contact angle was tested by multi-functional tensiometer (Krüss DSA30). The samples for contact angle measurements were prepared on glass substrates. <sup>1</sup>H NMR spectra were recorded on a Bruker Avance III 400 (400 MHz) spectrometer in DMSO-d<sub>6</sub>. Gel permeation chromatography (GPC) was performed using a Shimadzu GPC system (using low dispersity polystyrene as standard) equipped with 10 µm mixed columns in series and in line with a 20 Å refractive index detector. DMAc (with 0.3g/L LiBr and 0.5g/L BHT) was used as eluent at a flow rate of 1 mL/min.

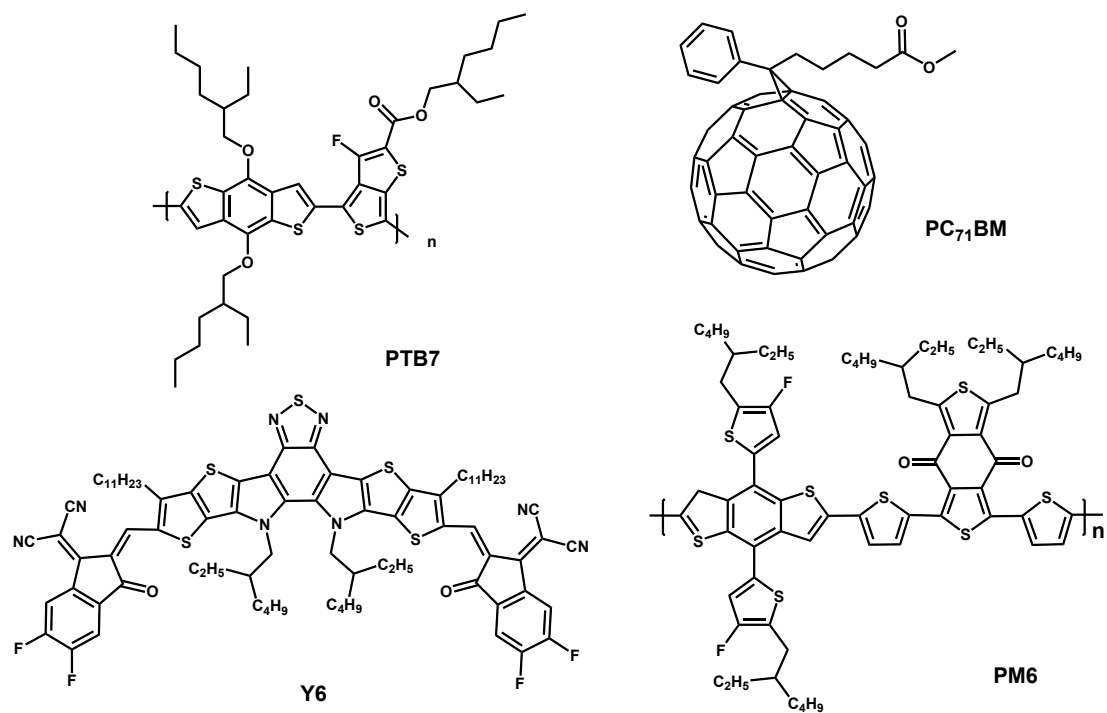

**Figure S1.** Chemical structures of photoactive layer materials.

**Table S1.** The photovoltaic parameters of devices based ZnO interlayers with or without post treatment (the average values and standard deviations are calculated from 5 devices).

| ETL | Post treatment   | $V_{OC}$ (V) | $J_{SC}$ (mA/cm <sup>2</sup> ) | $FF$ (%)   | PCE (%)   |
|-----|------------------|--------------|--------------------------------|------------|-----------|
| ZnO | no               | 0.74±0.01    | 14.91±0.17                     | 64.16±1.77 | 7.03±0.17 |
|     | 150 °C annealing | 0.74±0.01    | 14.69±0.21                     | 64.83±1.01 | 7.01±0.11 |

**Table S2.** Photovoltaic parameters of PTB7: PC<sub>71</sub>BM devices with normal geometry structure using ZnO nanoparticle interlayers (the average values and standard deviations are calculated from 5 devices).

| ETL | $V_{OC}$ (V) | $J_{SC}$ (mA/cm <sup>2</sup> ) | $FF$ (%)   | PCE (%)   |
|-----|--------------|--------------------------------|------------|-----------|
| ZnO | 0.71±0.01    | 14.69±0.29                     | 57.98±2.51 | 6.05±0.43 |

**Table S3.** The performance of PTB7:PC<sub>71</sub>BM based devices containing ZnO nanoparticle interlayers modified with different PA weight ratio (the average values are calculated from 15 devices and the optimal PCEs are listed in brackets).

| Interlayers | PA (wt%) | $V_{OC}$ (V) | $J_{sc}$ (mA/cm <sup>2</sup> ) | Calculated $J_{sc}$ (mA/cm <sup>2</sup> ) | $FF$ (%)   | PCE (%)         |
|-------------|----------|--------------|--------------------------------|-------------------------------------------|------------|-----------------|
| ZnO         | 0        | 0.73±0.01    | 14.79±0.19                     | 14.60                                     | 64.73±1.65 | 7.01±0.14(7.29) |
| ZnO:PA      | 5        | 0.74±0.01    | 15.72±0.01                     | 15.17                                     | 67.11±0.01 | 7.75±0.01(8.06) |
|             | 15       | 0.75±0.01    | 16.06±0.19                     | 15.32                                     | 70.10±0.83 | 8.42±0.16(8.70) |
|             | 25       | 0.76±0.01    | 16.07±0.08                     | 15.39                                     | 71.79±0.81 | 8.73±0.09(8.88) |
|             | 30       | 0.76±0.01    | 15.87±0.12                     | 15.30                                     | 69.47±0.79 | 8.37±0.14(8.68) |

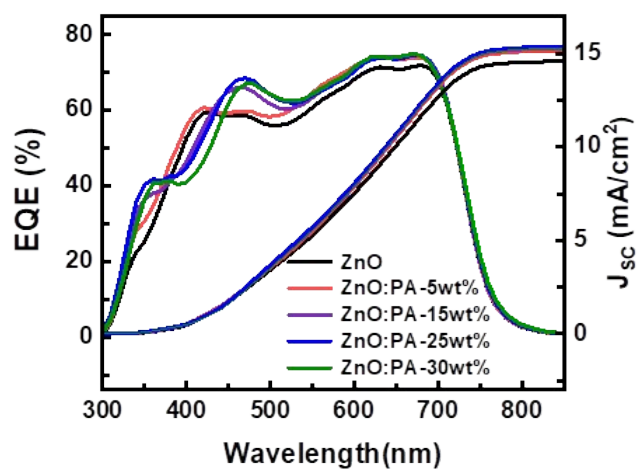

**Figure S2.** EQE spectra of PTB7:PC<sub>71</sub>BM based devices containing ZnO nanoparticle interlayers modified with different **PA** weight ratio.

**Table S4.** Stability measurements of devices based on PTB7: PC<sub>71</sub>BM with the pristine or PA-modified ZnO nanoparticle interlayers (the average values and standard deviations are calculated over 5 devices).

| Interlayers     | Time<br>(h) | $V_{OC}$ (V) | $J_{SC}$<br>(mA/cm <sup>2</sup> ) | $FF$ (%)   | PCE (%)   | Stability (%) |
|-----------------|-------------|--------------|-----------------------------------|------------|-----------|---------------|
| ZnO             | 0           | 0.73±0.01    | 14.64±0.41                        | 66.58±2.55 | 7.21±0.23 | 100           |
|                 | 24          | 0.73±0.01    | 14.56±0.67                        | 62.43±3.04 | 6.69±0.26 | 93            |
|                 | 48          | 0.73±0.02    | 13.66±0.76                        | 61.01±4.14 | 6.09±0.47 | 85            |
|                 | 72          | 0.73±0.02    | 13.37±1.15                        | 61.00±6.39 | 5.95±0.44 | 83            |
|                 | 120         | 0.73±0.01    | 12.78±0.44                        | 58.32±3.44 | 5.47±0.22 | 76            |
|                 | 240         | 0.72±0.01    | 12.65±0.24                        | 56.24±5.75 | 5.11±0.55 | 71            |
|                 | 360         | 0.69±0.01    | 12.86±0.59                        | 55.46±5.75 | 4.94±0.57 | 69            |
|                 | 480         | 0.67±0.02    | 12.50±0.50                        | 45.27±5.84 | 3.79±0.59 | 53            |
| ZnO:PA<br>(25%) | 0           | 0.75±0.00    | 15.96±0.08                        | 71.38±0.90 | 8.57±0.17 | 100           |
|                 | 24          | 0.75±0.00    | 15.64±0.12                        | 71.57±1.35 | 8.50±0.27 | 99            |
|                 | 48          | 0.75±0.00    | 15.53±0.17                        | 70.96±1.83 | 8.37±0.16 | 98            |
|                 | 72          | 0.75±0.01    | 15.55±0.20                        | 70.60±1.25 | 8.27±0.11 | 96            |
|                 | 120         | 0.75±0.01    | 15.26±0.14                        | 71.09±1.25 | 8.17±0.13 | 95            |

|     |           |            |            |           |    |
|-----|-----------|------------|------------|-----------|----|
| 240 | 0.76±0.00 | 15.13±0.29 | 69.91±1.13 | 8.21±0.19 | 96 |
| 360 | 0.75±0.00 | 15.32±0.14 | 69.21±1.36 | 7.99±0.18 | 93 |
| 480 | 0.75±0.00 | 15.17±0.17 | 69.75±0.94 | 7.99±0.16 | 93 |

**Table S5.** Photovoltaic parameters of PM6: Y6 devices in **Figure 2C** (the average values and standard deviations are calculated from 15 devices).

| Interlayers | PA<br>(wt%) | $V_{OC}$ (V) | $J_{SC}$<br>(mA/cm <sup>2</sup> ) | Calculated<br>$J_{SC}$<br>(mA/cm <sup>2</sup> ) | $FF$ (%)   | PCE (%)           |
|-------------|-------------|--------------|-----------------------------------|-------------------------------------------------|------------|-------------------|
| ZnO         | 0           | 0.83±0.01    | 23.68±0.50                        | 23.01                                           | 70.40±1.58 | 13.83±0.32(14.31) |
| ZnO:PA      | 25          | 0.85±0.01    | 25.56±0.32                        | 24.43                                           | 73.85±1.05 | 16.04±0.11(16.22) |

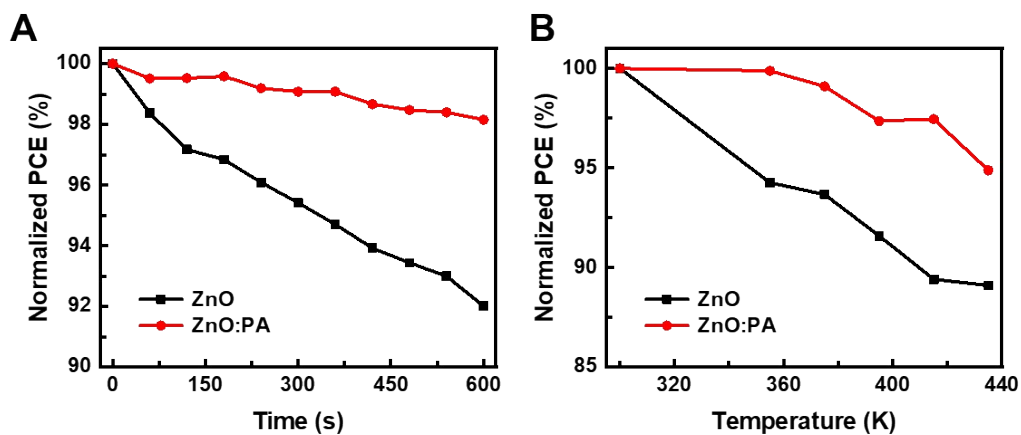

**Figure S3.** (A) The stabilized power output of the PM6:Y6 based devices containing pristine ZnO nanoparticle films or ZnO nanoparticle films with 25% PA modification; (B) thermal stability measurements of PM6:Y6 devices at the temperature range 300 K-435 K.

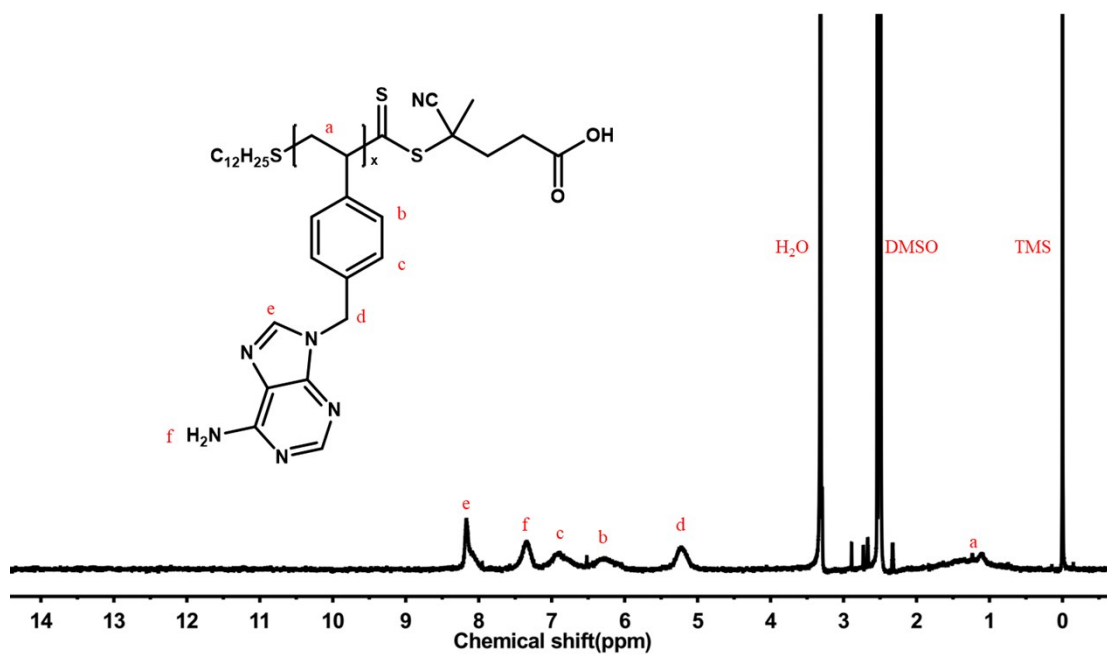

**Figure S4.**  $^1\text{H}$  NMR spectrum of PA dispersed in  $\text{DMSO-d}_6$ .

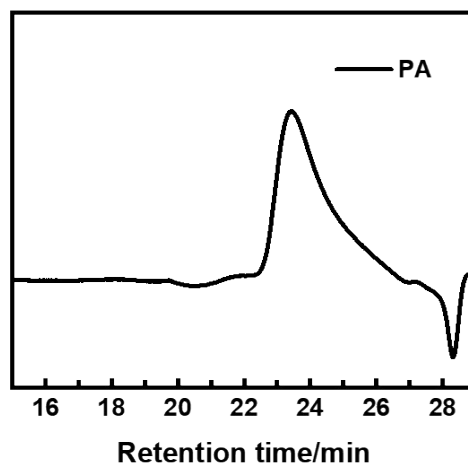

**Figure S5.** The GPC traces of PA ( $M_n = 8.1\text{kDa}$ ,  $M_w/M_n = 1.10$ ).
